# Supplementary material for: Silicon availability modifies nutrient use efficiency and content, C:N:P stoichiometry, and productivity of winter wheat (Triticum aestivum L.)
Source: PubMed Central journal article supplement (PMC5240101; doi:10.1038/srep40829), 2017-01-17

# **Silicon availability modifies nutrient use efficiency and content, C:N:P stoichiometry, and productivity of winter wheat (*Triticum aestivum* L.)**

Silke Neu<sup>1</sup>\*, Jörg Schaller<sup>2</sup>, E. Gert Dudel<sup>1,3</sup>

<sup>1</sup>Institute of Plant and Wood Chemistry, Technische Universität Dresden, Piennner Straße 19, 01737 Tharandt, Germany

<sup>2</sup>Environmental Geochemistry, Bayreuth Center for Ecology and Environmental Research (BayCEER), University Bayreuth, Universitätsstraße 30, 95447 Bayreuth, Germany

<sup>3</sup>Institute of General Ecology and Environmental Protection, Technische Universität Dresden, Piennner Straße 7, 01737 Tharandt, Germany

## **Supplementary Information**

**Table S1** Variation in concentration of Si, nutrients and nutrient stoichiometry in substrate and plant tissue of *Triticum aestivum* L. cv. Akteur (mmol g<sup>-1</sup> AFDM<sup>-1</sup>). Values are means ± SD; different letters indicate significant differences (<sup>abc</sup> for  $p < 0.001$ , <sup>de</sup> for  $p < 0.05$ ).

|            |       | soil  |         | root          |       | culm    |               | leaf sheath |         | leaf blade    |       | grain   |               |       |         |               |       |         |               |
|------------|-------|-------|---------|---------------|-------|---------|---------------|-------------|---------|---------------|-------|---------|---------------|-------|---------|---------------|-------|---------|---------------|
| silicon    | Si-0  | 0.01  | ± 0.01  | <sup>a</sup>  | 0.001 | ± 0.001 | <sup>a</sup>  | 0.01        | ± 0.00  | <sup>a</sup>  | 0.06  | ± 0.01  | <sup>a</sup>  | 0.11  | ± 0.02  | <sup>a</sup>  | 0.005 | ± 0.002 |               |
|            | Si-1  | 0.08  | ± 0.01  | <sup>a</sup>  | 0.016 | ± 0.003 | <sup>a</sup>  | 0.03        | ± 0.02  | <sup>ab</sup> | 0.13  | ± 0.01  | <sup>a</sup>  | 0.21  | ± 0.02  | <sup>a</sup>  | 0.003 | ± 0.001 |               |
|            | Si-10 | 0.19  | ± 0.01  | <sup>a</sup>  | 0.060 | ± 0.022 | <sup>a</sup>  | 0.11        | ± 0.01  | <sup>b</sup>  | 0.56  | ± 0.06  | <sup>b</sup>  | 0.60  | ± 0.08  | <sup>b</sup>  | 0.006 | ± 0.003 |               |
|            | Si-50 | 0.96  | ± 0.19  | <sup>b</sup>  | 0.172 | ± 0.034 | <sup>b</sup>  | 0.40        | ± 0.05  | <sup>c</sup>  | 1.52  | ± 0.19  | <sup>c</sup>  | 2.28  | ± 0.15  | <sup>c</sup>  | 0.005 | ± 0.003 |               |
| carbon     | Si-0  | 40.1  | ± 0.5   | <sup>b</sup>  | 39.2  | ± 0.6   |               | 39.7        | ± 0.2   | <sup>b</sup>  | 38.4  | ± 0.1   | <sup>bc</sup> | 38.5  | ± 0.2   | <sup>ab</sup> | 35.8  | ± 0.3   |               |
|            | Si-1  | 37.3  | ± 0.5   | <sup>ab</sup> | 39.9  | ± 0.7   |               | 39.4        | ± 0.2   | <sup>ab</sup> | 38.8  | ± 0.1   | <sup>c</sup>  | 39.0  | ± 0.1   | <sup>b</sup>  | 35.6  | ± 0.8   |               |
|            | Si-10 | 37.2  | ± 0.9   | <sup>a</sup>  | 39.0  | ± 0.4   |               | 39.3        | ± 0.1   | <sup>ab</sup> | 38.2  | ± 0.1   | <sup>ab</sup> | 40.4  | ± 0.2   | <sup>c</sup>  | 35.4  | ± 0.9   |               |
|            | Si-50 | 36.6  | ± 1.1   | <sup>a</sup>  | 39.4  | ± 0.2   |               | 38.7        | ± 0.2   | <sup>a</sup>  | 37.8  | ± 0.1   | <sup>a</sup>  | 38.3  | ± 0.2   | <sup>a</sup>  | 35.0  | ± 1.6   |               |
| nitrogen   | Si-0  | 0.74  | ± 0.02  |               | 0.55  | ± 0.07  |               | 0.10        | ± 0.01  |               | 0.17  | ± 0.01  | <sup>d</sup>  | 0.37  | ± 0.02  | <sup>b</sup>  | 1.29  | ± 0.04  |               |
|            | Si-1  | 0.69  | ± 0.01  |               | 0.49  | ± 0.04  |               | 0.11        | ± 0.03  |               | 0.20  | ± 0.01  | <sup>e</sup>  | 0.39  | ± 0.02  | <sup>b</sup>  | 1.26  | ± 0.06  |               |
|            | Si-10 | 0.70  | ± 0.01  |               | 0.59  | ± 0.05  |               | 0.11        | ± 0.00  |               | 0.20  | ± 0.03  | <sup>e</sup>  | 0.17  | ± 0.01  | <sup>a</sup>  | 1.26  | ± 0.04  |               |
|            | Si-50 | 0.72  | ± 0.04  |               | 0.50  | ± 0.10  |               | 0.14        | ± 0.02  |               | 0.18  | ± 0.01  | <sup>de</sup> | 0.36  | ± 0.02  | <sup>b</sup>  | 1.20  | ± 0.07  |               |
| phosphorus | Si-0  | 0.012 | ± 0.001 |               | 0.013 | ± 0.001 | <sup>d</sup>  | 0.003       | ± 0.000 | <sup>d</sup>  | 0.013 | ± 0.004 |               | 0.009 | ± 0.001 | <sup>a</sup>  | 0.092 | ± 0.008 |               |
|            | Si-1  | 0.013 | ± 0.001 |               | 0.021 | ± 0.002 | <sup>e</sup>  | 0.005       | ± 0.002 | <sup>de</sup> | 0.014 | ± 0.002 |               | 0.049 | ± 0.005 | <sup>b</sup>  | 0.097 | ± 0.008 |               |
|            | Si-10 | 0.014 | ± 0.002 |               | 0.022 | ± 0.003 | <sup>e</sup>  | 0.006       | ± 0.002 | <sup>de</sup> | 0.017 | ± 0.002 |               | 0.059 | ± 0.015 | <sup>b</sup>  | 0.100 | ± 0.002 |               |
|            | Si-50 | 0.012 | ± 0.001 |               | 0.018 | ± 0.002 | <sup>e</sup>  | 0.007       | ± 0.003 | <sup>e</sup>  | 0.016 | ± 0.001 |               | 0.053 | ± 0.009 | <sup>b</sup>  | 0.098 | ± 0.004 |               |
| C:N        | Si-0  | 54    | ± 1     |               | 72    | ± 9     |               | 397         | ± 42    |               | 233   | ± 18    | <sup>e</sup>  | 104   | ± 4     | <sup>a</sup>  | 27.7  | ± 0.6   | <sup>d</sup>  |
|            | Si-1  | 54    | ± 1     |               | 82    | ± 7     |               | 366         | ± 88    |               | 192   | ± 14    | <sup>d</sup>  | 101   | ± 5     | <sup>a</sup>  | 28.2  | ± 0.8   | <sup>de</sup> |
|            | Si-10 | 53    | ± 1     |               | 67    | ± 6     |               | 354         | ± 8     |               | 192   | ± 25    | <sup>d</sup>  | 237   | ± 11    | <sup>b</sup>  | 28.1  | ± 0.5   | <sup>de</sup> |
|            | Si-50 | 51    | ± 4     |               | 81    | ± 17    |               | 291         | ± 44    |               | 215   | ± 11    | <sup>de</sup> | 106   | ± 7     | <sup>a</sup>  | 29.3  | ± 0.3   | <sup>e</sup>  |
| C:P        | Si-0  | 3245  | ± 223   |               | 2928  | ± 105   | <sup>b</sup>  | 15289       | ± 1518  | <sup>e</sup>  | 3216  | ± 811   |               | 4248  | ± 642   | <sup>b</sup>  | 391   | ± 37    |               |
|            | Si-1  | 2807  | ± 262   |               | 1967  | ± 263   | <sup>ab</sup> | 9693        | ± 3468  | <sup>d</sup>  | 2772  | ± 474   |               | 805   | ± 89    | <sup>a</sup>  | 369   | ± 24    |               |
|            | Si-10 | 2762  | ± 527   |               | 1827  | ± 304   | <sup>a</sup>  | 6857        | ± 2123  | <sup>d</sup>  | 2225  | ± 265   |               | 714   | ± 155   | <sup>a</sup>  | 355   | ± 8     |               |
|            | Si-50 | 2951  | ± 119   |               | 2166  | ± 316   | <sup>ab</sup> | 6216        | ± 2279  | <sup>d</sup>  | 2442  | ± 164   |               | 742   | ± 110   | <sup>a</sup>  | 359   | ± 15    |               |
| N:P        | Si-0  | 60    | ± 4     |               | 41    | ± 4     | <sup>e</sup>  | 39          | ± 8     | <sup>e</sup>  | 14    | ± 4     |               | 41    | ± 9     | <sup>b</sup>  | 14.1  | ± 1.4   | <sup>e</sup>  |
|            | Si-1  | 52    | ± 5     |               | 24    | ± 3     | <sup>d</sup>  | 26          | ± 7     | <sup>de</sup> | 15    | ± 3     |               | 8     | ± 1     | <sup>a</sup>  | 13.1  | ± 0.6   | <sup>de</sup> |
|            | Si-10 | 52    | ± 9     |               | 28    | ± 6     | <sup>d</sup>  | 19          | ± 6     | <sup>d</sup>  | 12    | ± 3     |               | 3     | ± 1     | <sup>a</sup>  | 12.6  | ± 0.2   | <sup>de</sup> |
|            | Si-50 | 58    | ± 6     |               | 28    | ± 9     | <sup>d</sup>  | 22          | ± 11    | <sup>de</sup> | 11    | ± 1     |               | 7     | ± 1     | <sup>a</sup>  | 12.3  | ± 0.6   | <sup>d</sup>  |

**Table S2** Variation in concentration of Si, nutrients and nutrient stoichiometry in flag leaf tissue of *Triticum aestivum* L. cv. Akteur (mmol g<sup>-1</sup> AFDM<sup>-1</sup>). Values are means ± SD; different letters indicate significant differences (<sup>abc</sup> for  $p < 0.001$ , <sup>de</sup> for  $p < 0.05$ ).

|            |       | flag leaf sheath |               | flag leaf blade |               |
|------------|-------|------------------|---------------|-----------------|---------------|
| silicon    | Si-0  | 0.07 ± 0.01      | <sup>a</sup>  | 0.15 ± 0.04     | <sup>a</sup>  |
|            | Si-1  | 0.13 ± 0.01      | <sup>a</sup>  | 0.28 ± 0.05     | <sup>a</sup>  |
|            | Si-10 | 0.42 ± 0.04      | <sup>b</sup>  | 0.74 ± 0.05     | <sup>b</sup>  |
|            | Si-50 | 1.58 ± 0.04      | <sup>c</sup>  | 3.65 ± 0.55     | <sup>c</sup>  |
| carbon     | Si-0  | 39.1 ± 0.2       | <sup>e</sup>  | 38.3 ± 0.4      | <sup>b</sup>  |
|            | Si-1  | 39.2 ± 0.1       | <sup>e</sup>  | 39.0 ± 0.6      | <sup>b</sup>  |
|            | Si-10 | 38.1 ± 1.0       | <sup>de</sup> | 38.7 ± 0.1      | <sup>b</sup>  |
|            | Si-50 | 37.8 ± 0.4       | <sup>d</sup>  | 35.6 ± 0.4      | <sup>a</sup>  |
| nitrogen   | Si-0  | 0.22 ± 0.03      |               | 0.38 ± 0.02     | <sup>e</sup>  |
|            | Si-1  | 0.20 ± 0.02      |               | 0.39 ± 0.02     | <sup>e</sup>  |
|            | Si-10 | 0.20 ± 0.01      |               | 0.38 ± 0.02     | <sup>e</sup>  |
|            | Si-50 | 0.19 ± 0.01      |               | 0.32 ± 0.02     | <sup>d</sup>  |
| phosphorus | Si-0  | 0.02 ± 0.01      |               | 0.04 ± 0.003    | <sup>b</sup>  |
|            | Si-1  | 0.02 ± 0.02      |               | 0.03 ± 0.004    | <sup>ab</sup> |
|            | Si-10 | 0.01 ± 0.00      |               | 0.03 ± 0.004    | <sup>ab</sup> |
|            | Si-50 | 0.01 ± 0.00      |               | 0.02 ± 0.004    | <sup>a</sup>  |
| C:N        | Si-0  | 179 ± 22         |               | 100 ± 4         | <sup>d</sup>  |
|            | Si-1  | 203 ± 25         |               | 101 ± 4         | <sup>d</sup>  |
|            | Si-10 | 187 ± 15         |               | 102 ± 5         | <sup>de</sup> |
|            | Si-50 | 200 ± 8          |               | 111 ± 4         | <sup>e</sup>  |
| C:P        | Si-0  | 2566 ± 1549      |               | 1100 ± 113      | <sup>d</sup>  |
|            | Si-1  | 2924 ± 1767      |               | 1277 ± 158      | <sup>d</sup>  |
|            | Si-10 | 3536 ± 744       |               | 1295 ± 149      | <sup>d</sup>  |
|            | Si-50 | 3328 ± 212       |               | 2004 ± 469      | <sup>e</sup>  |
| N:P        | Si-0  | 14.8 ± 9.8       |               | 11.0 ± 1.0      | <sup>d</sup>  |
|            | Si-1  | 13.8 ± 7.3       |               | 12.6 ± 1.3      | <sup>d</sup>  |
|            | Si-10 | 18.9 ± 3.9       |               | 12.7 ± 1.6      | <sup>d</sup>  |
|            | Si-50 | 16.6 ± 0.8       |               | 18.0 ± 4.1      | <sup>e</sup>  |

**Table S3** Total\* concentration (mg g<sup>-1</sup> DM<sup>-1</sup>) of selected elements in the substrate prior to fertilization. Values are means ± SD.

|                |              |
|----------------|--------------|
| aluminum (Al)  | 17.84 ± 0.49 |
| calcium (Ca)   | 18.47 ± 0.28 |
| iron (Fe)      | 11.02 ± 0.33 |
| potassium (K)  | 2.25 ± 0.11  |
| magnesium (Mg) | 2.05 ± 0.08  |
| manganese (Mn) | 0.12 ± 0.00  |
| phosphorus (P) | 0.71 ± 0.01  |

\*digested in a microwave digestion system (CEM Mars5, CEM Corporation, Matthews, NC, USA) at 180 °C in 3 ml HNO<sub>3</sub>, 1.5 ml HF and 3 ml H<sub>3</sub>BO<sub>3</sub>

**Figure S2** Element concentration in grains and flag leaf blades of *Triticum aestivum* L. cv. Akteur ( $\text{mg g}^{-1}$  AFDM $^{-1}$ , Si-0) at harvest. Values are means (bars)  $\pm$  SD (whiskers).

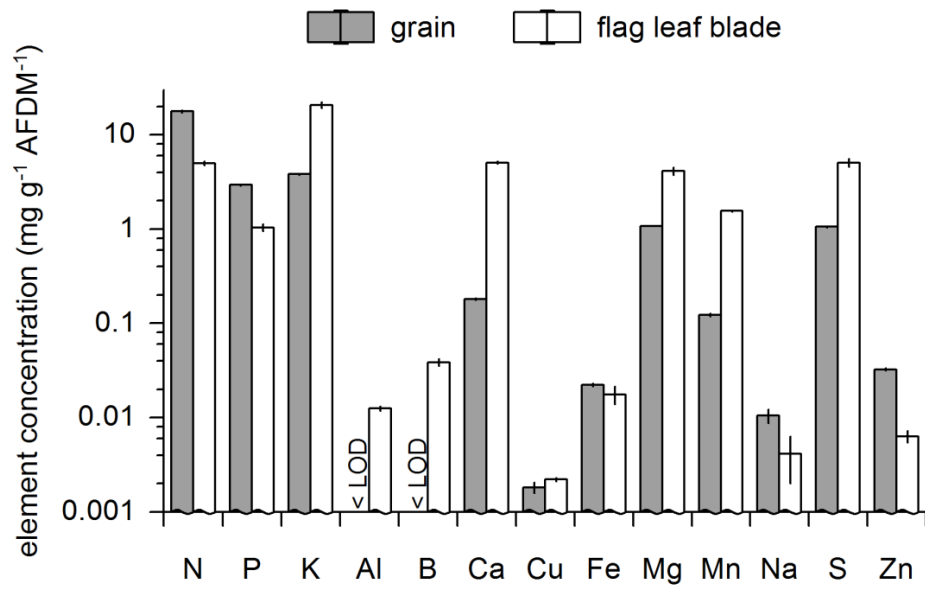

Supplement: srep40829-s1.pdf [file srep40829-s1.pdf]
